# Supplementary material for: Taxonomic identification, genomic analysis, and optimized chromium(VI) bioreduction by Microbacterium triticisoli sp. nov. M28T
Source: PeerJ. 2025 Oct 23;13:e20192. doi: 10.7717/peerj.20192 (PMC12554309; doi:10.7717/peerj.20192)
Supplement: Supplemental Information 7 [file peerj-13-20192-s007.xlsx]

## Sheet: Figure 3
OD600 under different Cr (VI) concentration conditions
Time/h	25mg/L	25mg/L	25mg/L	50mg/L	50mg/L	50mg/L	75mg/L	75mg/L	75mg/L	100mg/L	100mg/L	100mg/L	125mg/L	125mg/L	125mg/L	150mg/L	150mg/L	150mg/L
0	0.221	0.2	0.207	0.205	0.2	0.206	0.211	0.212	0.185	0.199	0.196	0.182	0.152	0.154	0.133	0.133	0.132	0.147
6	0.677	0.631	0.666	0.564	0.521	0.541	0.428	0.396	0.399	0.385	0.378	0.367	0.351	0.348	0.374	0.312	0.298	0.32
12	1.5	1.443	1.644	1.05	1.107	1.17	0.918	1.809	0.822	0.634	0.746	0.728	0.624	0.621	0.682	0.496	0.504	0.484
24	3.53	3.3	3.7	2.24	2.255	2.45	1.835	1.83	1.86	1.262	1.332	1.32	1.212	1.253	1.212	0.745	0.635	0.54
30	3.955	3.61	4.16	2.75	2.9	2.9	2.195	2.29	2.195	1.855	2.11	2.11	1.815	1.875	2.02	0.711	0.711	0.584
36	4.34	4.025	4.705	2.755	3.025	3.025	2.335	2.305	2.335	2.05	2.185	2.185	1.91	1.9	1.985	0.722	0.722	0.622
48	5.135	5.055	5.675	2.715	3.17	3.17	2.585	2.725	2.585	2.28	2.495	2.495	1.82	1.85	2.09	0.77	0.77	0.542
54	5.775	5.1	5.515	3.22	3.84	3.84	2.675	2.75	2.675	2.09	2.66	2.66	1.73	1.9	1.99	0.955	0.955	0.67
60	5.505	5.2	5.91	3.62	4.2	4.2	2.88	2.98	2.88	2.15	2.8	2.8	1.855	2	2.2	0.995	0.995	0.755
72	5.09	5.235	5.41	3.67	4.505	4.505	3.72	3.42	3.72	2.98	3.27	3.27	2.33	2.4	2.82	0.7	0.747	0.637
84	5.06	5.04	5.325	4.37	4.72	4.5	4.535	3.945	4	3.36	3.62	3.5	2.785	2.9	3.29	0.7	0.652	0.464
Cr (VI) reduction rate under different Cr (VI) concentration conditions
Time/h	25mg/L	25mg/L	25mg/L	50mg/L	50mg/L	50mg/L	75mg/L	75mg/L	75mg/L	100mg/L	100mg/L	100mg/L	125mg/L	125mg/L	125mg/L	150mg/L	150mg/L	150mg/L
0	0	0	0	0	0	0	0	0	0	0	0	0	0	0	0	0	0	0
6	0	0.04	0.05	0.01	0.02	0.02	0.02	0.05	-0.01	0.01	0	0	0.01	0.02	0.04	0.03	0.02	0.06
12	0.12	0.13	0.14	0.07	0.06	0.06	0.06	0.06	0.02	0.03	0.02	0.08	0.03	0.03	0.02	0.07	0.01	0.04
24	0.37	0.42	0.38	0.2	0.2	0.2	0.15	0.16	0.11	0.09	0.11	0.12	0.11	0.14	0.12	0.09	0.07	0.1
30	0.45	0.47	0.49	0.26	0.24	0.23	0.18	0.23	0.14	0.11	0.14	0.14	0.13	0.15	0.15	0.1	0.07	0.1
36	0.58	0.55	0.61	0.32	0.3	0.31	0.22	0.24	0.28	0.13	0.15	0.16	0.17	0.19	0.19	0.13	0.1	0.13
48	0.72	0.72	0.74	0.44	0.41	0.48	0.28	0.31	0.25	0.21	0.22	0.23	0.24	0.21	0.21	0.13	0.12	0.14
54	0.82	0.77	0.86	0.48	0.47	0.47	0.29	0.35	0.35	0.24	0.26	0.27	0.25	0.27	0.27	0.14	0.13	0.16
60	0.83	0.8	0.87	0.47	0.48	0.48	0.3	0.34	0.32	0.22	0.25	0.26	0.2	0.23	0.23	0.1	0.08	0.12
72	0.88	0.9	0.91	0.55	0.57	0.56	0.36	0.41	0.4	0.27	0.31	0.32	0.26	0.33	0.33	0.14	0.15	0.17
84	0.84	0.88	0.85	0.54	0.6	0.61	0.36	0.39	0.47	0.25	0.3	0.34	0.23	0.31	0.31	0.14	0.13	0.18

## Sheet: Figure 4
OD600 under different temperature conditions
Time/h	28℃	28℃	28℃	30℃	30℃	30℃	35℃	35℃	35℃	37℃	37℃	37℃	40℃	40℃	40℃
0	0.056	0.053	0.056	0.055	0.041	0.043	0.049	0.055	0.052	0.053	0.042	0.039	0.05	0.042	0.049
6	0.138	0.128	0.119	0.162	0.177	0.129	0.231	0.232	0.26	0.247	0.264	0.222	0.141	0.164	0.142
12	0.456	0.515	0.487	0.6	0.665	0.67	0.973	0.982	0.999	1.075	1.042	0.997	0.583	0.625	0.514
24	0.923	0.855	0.848	1.096	1.225	1.232	2.548	2.544	2.708	3.4	3.356	2.892	2.276	2	2.136
30	1.105	0.98	0.97	1.55	1.87	1.76	3.265	3.325	3.385	4	3.83	4.28	3.43	2.915	3.15
36	0.99	1	0.92	1.8	1.955	2.21	3.885	3.485	3.685	5	4.7	4.8	3.5	3.5	3.5
48	1.24	1.28	1.39	2.85	2.85	2.75	4	3.87	4.2	5.085	5.04	5.04	4.1	4.1	4.1
54	1.25	1.4	1.375	3.02	3.02	3.31	4.125	4.045	4.235	5.165	5.135	5.135	4.725	4.725	4.725
60	1.235	1.465	1.54	3.76	3.76	3.76	4.6	4.305	4.68	5.415	5.355	5.355	4.89	4.89	4.89
72	1.555	2	1.955	4.96	4.96	4.835	5.1	4.6	5.19	5.26	5.395	5.395	5.115	5.115	5.115
84	1.6	2	2	5	4.975	4.95	6.1	5	5	5	5.5	6	4.9	5.5	5.1
The reduction rate of Cr (VI) under different temperature conditions
Time/h	28℃	28℃	28℃	30℃	30℃	30℃	35℃	35℃	35℃	37℃	37℃	37℃	40℃	40℃	40℃
0	0	0	0	0	0	0	0	0	0	0	0	0	0	0	0
6	0.02	0.04	0.06	0.05	0.06	-0.05	0.05	0.06	0.05	-0.03	0.09	0.04	0.07	0.03	0.03
12	0.08	0.04	0.07	0.04	0.07	-0.01	0.08	0.1	0.08	0	0.08	0.08	0.08	0.07	0.05
24	0.1	0.11	0.1	0.12	0.14	0.06	0.24	0.24	0.24	0.28	0.33	0.25	0.14	0.13	0.19
30	0.17	0.19	0.2	0.2	0.22	0.14	0.36	0.35	0.36	0.35	0.4	0.39	0.2	0.17	0.18
36	0.23	0.24	0.22	0.26	0.23	0.17	0.42	0.41	0.42	0.38	0.48	0.48	0.2	0.18	0.19
48	0.3	0.3	0.29	0.32	0.32	0.29	0.52	0.51	0.52	0.56	0.61	0.61	0.32	0.25	0.3
54	0.35	0.35	0.35	0.39	0.39	0.35	0.6	0.58	0.6	0.59	0.65	0.65	0.39	0.36	0.38
60	0.33	0.33	0.32	0.37	0.39	0.35	0.6	0.61	0.6	0.65	0.67	0.67	0.4	0.37	0.38
72	0.38	0.38	0.39	0.47	0.49	0.44	0.63	0.64	0.63	0.72	0.69	0.69	0.43	0.38	0.41
84	0.44	0.44	0.43	0.54	0.5	0.47	0.64	0.65	0.64	0.65	0.69	0.69	0.43	0.4	0.42
OD600 under different pH conditions
Time/h	6	6	6	6.5	6.5	6.5	7	7	7	7.5	7.5	7.5	8	8	8	8.5	8.5	8.5
0	0.179	0.176	0.156	0.18	0.213	0.214	0.21	0.202	0.195	0.242	0.218	0.212	0.218	0.237	0.212	0.222	0.223	0.2
6	0.326	0.301	0.299	0.717	0.767	0.687	0.572	0.552	0.514	1.074	0.958	0.926	0.958	0.949	1.017	0.779	0.817	0.838
12	0.494	0.522	0.48	2.15	2.14	2.242	1.474	1.574	1.59	2.624	2.83	2.71	2.648	2.546	2.794	2.246	2.382	2.252
24	0.836	1.152	0.872	4.176	3.792	4.152	3.416	3.364	3.472	5.248	5.62	5.248	4.436	4.316	4.832	4.388	4.036	4.064
30	1.26	1.2	1.32	4.648	4.008	5.032	4.008	3.896	4.104	6.104	6.52	6.016	5.088	4.824	5.568	4.976	4.768	4.936
36	2.112	1.928	2.08	4.896	5.504	5.424	4.32	4.208	4.48	6.176	6.288	5.688	5.4	5.336	5.472	5.208	4.904	5.256
48	4.8	4.8	4.552	4.8	5.112	5.632	5.024	4.96	4.888	5.152	5.912	5.536	4.992	5.28	5.84	5.408	5.032	5
54	4.96	4.96	4.8	6.064	6.056	5.584	5.28	5.488	4.888	5.08	5.56	5.416	4.952	5.16	5.312	5.168	4.952	5.032
60	5.6	5.328	5.264	5.536	5.656	5.64	5.52	4.96	5.192	5.064	5.208	5.16	4.872	5.168	5.216	4.848	4.912	4.864
72	5.76	6.136	5.84	5.064	5.184	5.304	4.88	4.608	4.664	4.744	4.52	4.592	5.336	4.792	5.04	4.664	4.616	4.512
84	5.488	5.576	5.864	4.528	4.088	4.264	4.312	4.184	4.136	3.328	3.864	3.72	3.672	3.768	4.088	3.984	4.264	4.088
The reduction rate of Cr (VI) under different pH conditions
Time/h	6	6	6	6.5	6.5	6.5	7	7	7	7.5	7.5	7.5	8	8	8	8.5	8.5	8.5
0	0	0	0	0	0	0	0	0	0	0	0	0	0	0	0	0	0	0
6	0.09	0.04	0.05	0.04	0.06	0	0.04	0.06	0.06	0.02	-0.02	0.04	-0.02	0.02	0.04	-0.03	0	0.04
12	0.11	0.09	0.1	0.11	0.09	0.07	0.11	0.13	0.13	0.07	0.08	0.07	0.08	0.08	0.06	0.02	0.04	0.05
24	0.2	0.2	0.17	0.43	0.43	0.4	0.46	0.52	0.5	0.31	0.32	0.25	0.22	0.25	0.23	0.16	0.18	0.17
30	0.25	0.28	0.21	0.52	0.51	0.5	0.56	0.63	0.6	0.39	0.37	0.34	0.29	0.33	0.31	0.22	0.24	0.27
36	0.31	0.41	0.42	0.6	0.6	0.58	0.64	0.7	0.68	0.43	0.42	0.4	0.33	0.34	0.34	0.3	0.3	0.31
48	0.49	0.48	0.49	0.68	0.66	0.63	0.72	0.77	0.77	0.48	0.48	0.42	0.38	0.39	0.35	0.34	0.35	0.38
54	0.57	0.56	0.58	0.72	0.73	0.63	0.76	0.81	0.82	0.47	0.48	0.43	0.37	0.41	0.37	0.34	0.37	0.37
60	0.57	0.6	0.61	0.74	0.75	0.64	0.8	0.86	0.85	0.48	0.48	0.43	0.37	0.38	0.36	0.34	0.38	0.37
72	0.67	0.67	0.67	0.76	0.72	0.7	0.85	0.86	0.85	0.48	0.48	0.42	0.37	0.38	0.35	0.3	0.33	0.39
84	0.67	0.67	0.67	0.8	0.75	0.72	0.86	0.86	0.82	0.53	0.48	0.47	0.4	0.42	0.39	0.36	0.36	0.4

## Sheet: Figure 5
Different electron donor conditions OD600
Time/h	contrast	contrast	contrast	glucose	glucose	glucose	sucrose	sucrose	sucrose	sodium lactate	sodium lactate	sodium lactate	lactosum	lactosum	lactosum	glycerol	glycerol	glycerol	sodium acetate	sodium acetate	sodium acetate	sodium pyruvate	sodium pyruvate	sodium pyruvate	fructose	fructose	fructose
0		0.191	0.189	0.178	0.199	0.166	0.189	0.194	0.177	0.186	0.183	0.186	0.179	0.185	0.183	0.181	0.177	0.184	0.194	0.18	0.186	0.173	0.176	0.189	0.18	0.175	0.178
6	0.562	0.594	0.609	0.536	0.538	0.509	0.631	0.637	0.61	0.695	0.683	0.709	0.58	0.556	0.518	0.542	0.54	0.536	0.528	0.52	0.406	0.536	0.516	0.574	0.412	0.456	0.474
12	1.34	1.352	1.32	1.58	1.576	1.536	1.808	1.732	1.844	2	2	2	1.29	1.296	1.256	1.306	1.39	1.396	0.854	0.854	0.876	1.192	1.236	1.344	1.03	1.104	1.102
24	2.4	2.238	2.142	2.36	2.388	2.4	2.62	2.708	2.86	2.172	2.384	2.28	3	3	2.94	4.14	4.08	4.2	1.914	2.364	2.484	2.22	2.28	2.16	4.464	4.104	4.044
30	2.658	2.682	2.562	2.488	2.488	2.544	3.36	3.304	3.436	2.316	2.192	2.048	3.12	3.222	3.042	4.23	4.23	4.488	2.898	3.03	2.772	2.712	2.346	2.43	4.662	4.356	4.404
36	2.688	2.676	2.724	2.524	2.48	2.592	3.572	3.76	3.6	2.204	2.448	1.992	3.744	3.792	3.33	4.14	4.14	4.698	3.306	3.468	3.57	2.526	2.442	2.478	4.926	4.818	4.734
48	2.532	2.988	2.988	2.528	2.5	2.616	3.852	4.284	4.252	2.092	2.104	2.048	4.308	4.518	4.248	4.848	4.848	4.89	4.134	3.498	3.714	3.144	2.652	2.94	5.16	5.43	5.514
54	2.706	3	3	2.616	2.644	2.572	4.048	4.276	4.268	2.476	2.376	2.328	5.268	5.022	5.046	4.398	4.398	4.506	3.678	3.768	3.888	3.402	3.552	3.366	5.226	5.034	5.07
60	3.138	3.3	3.3	2.436	2.436	2.556	3.996	4.16	4.108	2.46	2.376	2.256	5.346	5.034	4.86	4.656	4.656	4.698	4.26	4.302	4.218	3.378	3.678	3.654	5.232	5.22	4.944
Cr (VI) reduction rate under different electron donor conditions
Time/h	contrast	contrast	contrast	glucose	glucose	glucose	sucrose	sucrose	sucrose	sodium lactate	sodium lactate	sodium lactate	lactosum	lactosum	lactosum	glycerol	glycerol	glycerol	sodium acetate	sodium acetate	sodium acetate	sodium pyruvate	sodium pyruvate	sodium pyruvate	fructose	fructose	fructose
0	1	1	1	1	1	1	1	1	1	1	1	1	1	1	1	1	1	1	1	1	1	1	1	1	1	1	1
6	1	0.97	1.01	0.94	1	0.97	0.99	0.99	0.98	1	0.99	0.97	0.98	0.97	0.95	0.97	0.97	0.98	0.96	0.99	0.96	0.99	0.97	1.01	0.95	0.97	0.94
12	0.94	0.94	0.94	0.83	0.84	0.85	0.89	0.88	0.87	0.91	0.88	0.86	0.92	0.93	0.92	0.88	0.9	0.92	0.96	0.97	0.96	0.92	0.91	0.93	0.87	0.89	0.84
24	0.84	0.86	0.85	0.46	0.46	0.42	0.08	0.1	0.12	0.63	0.62	0.6	0.48	0.47	0.49	0.02	0.06	0.08	0.9	0.93	0.93	0.45	0.4	0.46	0.5	0.4	0.43
30	0.75	0.77	0.81	0.36	0.37	0.33	0.03	0.03	0.03	0.52	0.52	0.51	0.12	0.1	0.13	0.02	0.03	0.02	0.82	0.83	0.81	0.23	0.2	0.25	0.06	0.03	0.02
36	0.7	0.74	0.77	0.33	0.34	0.3	0.02	0.03	0.03	0.5	0.47	0.49	0.02	0.02	0.01	0.01	0.02	0.01	0.78	0.79	0.78	0.18	0.15	0.24	0.02	0.02	0.01
48	0.59	0.64	0.66	0.23	0.25	0.19	0.03	0.03	0.03	0.34	0.35	0.36	0.04	0.03	0.03	0.02	0.03	0.02	0.62	0.67	0.62	0.06	0.03	0.09	0.03	0.03	0.03
54	0.55	0.62	0.63	0.2	0.22	0.17	0.03	0.03	0.04	0.32	0.32	0.32	0.02	0.02	0.03	0.01	0.01	0.01	0.59	0.65	0.61	0.04	0.03	0.07	0.02	0.02	0.02
60	0.56	0.61	0.62	0.19	0.19	0.15	0.02	0.02	0.02	0.29	0.31	0.31	0.04	0.03	0.03	0.02	0.03	0.02	0.55	0.51	0.5	0.03	0.02	0.05	0.03	0.04	0.03
OD600 under different sucrose concentration conditions
Time/h	0g/L	0g/L	0g/L	1g/L	1g/L	1g/L	2.5g/L	2.5g/L	2.5g/L	5g/L	5g/L	5g/L	7.5g/L	7.5g/L	7.5g/L	10g/L	10g/L	10g/L
0	0.198	0.192	0.21	0.209	0.192	0.205	0.202	0.201	0.195	0.182	0.192	0.184	0.205	0.197	0.196	0.194	0.204	0.204
12	1.265	1.255	1.375	1.715	1.635	1.855	1.83	1.94	1.845	1.85	1.815	1.9	2.045	1.895	1.9	2.2	2.325	2.15
18	1.82	1.8	1.85	3.025	3	3.04	2.855	2.985	2.9	2.9	2.895	2.95	3.3	3.375	3.29	3.51	3.825	3.605
24	2.7	2.745	2.665	3.7	3.5	3.755	3.795	3.785	3.9	4.085	4.155	4.25	4.35	4.42	4.305	5.355	4.94	4.91
28	2.975	2.99	3.015	4.38	3.955	3.985	4.295	4.295	4.3	4.66	4.755	4.5	5.19	5.245	4.9	5.635	5.805	5.185
The reduction rate of Cr (VI) under different sucrose concentrations
Time/h	0g/L	0g/L	0g/L	1g/L	1g/L	1g/L	2.5g/L	2.5g/L	2.5g/L	5g/L	5g/L	5g/L	7.5g/L	7.5g/L	7.5g/L	10g/L	10g/L	10g/L
0	0	0	0	0	0	0	0	0	0	0	0	0	0	0	0	0	0	0
12	0.06	0.06	0.06	0.08	0.08	0.08	0.12	0.09	0.11	0.1	0.1	0.12	0.14	0.09	0.12	0.13	0.14	0.1
18	0.11	0.11	0.14	0.42	0.39	0.43	0.5	0.49	0.47	0.5	0.48	0.51	0.52	0.53	0.55	0.46	0.47	0.45
24	0.15	0.21	0.19	0.67	0.67	0.66	0.88	0.9	0.91	0.94	0.9	0.83	0.84	0.85	0.86	0.86	0.8	0.77
28	0.22	0.21	0.24	0.76	0.72	0.69	0.99	0.97	0.93	0.99	0.99	0.99	0.97	0.98	0.99	0.99	0.94	0.91

## Sheet: Figure 6
OD600 before and after optimization
Time/h	50mg/L+30℃+pH nature	50mg/L+30℃+pH nature	50mg/L+30℃+pH nature	pH7.0+37℃+2.5g/L sucrose	pH7.0+37℃+2.5g/L sucrose	pH7.0+37℃+2.5g/L sucrose
0	0.207	0.195	0.195	0.191	0.19	0.19
5	0.64	0.512	0.496	0.81	0.78	0.746
12	1.392	1.116	1.044	3.15	3.066	2.61
18	1.76	1.485	1.51	3.89	4.22	3.915
24	2.418	1.998	2.034	5.418	5.22	5.01
Cr (VI) reduction rates before and after optimization
Time/h	50mg/L+30℃+pH nature	50mg/L+30℃+pH nature	50mg/L+30℃+pH nature	pH7.0+37℃+2.5g/L sucrose	pH7.0+37℃+2.5g/L sucrose	pH7.0+37℃+2.5g/L sucrose
0	0.207	0.195	0.195	0.191	0.19	0.19
5	0.64	0.512	0.496	0.81	0.78	0.746
12	1.392	1.116	1.044	3.15	3.066	2.61
18	1.76	1.485	1.51	3.89	4.22	3.915
24	2.418	1.998	2.034	5.418	5.22	5.01
